# Supplementary material for: Potential Health Benefits of Yeast-Leavened Bread Containing LAB Pediococcus pentosaceus Fermented Pitaya (Hylocereus undatus): Both In Vitro and In Vivo Aspects
Source: MDPI journal article supplement (doi:10.3390/foods11213416), 2022-10-28
Supplement: s1 [file s1]

## Supplementary material.

**Table S1.** Formulation of bread for use in this study.

| Ingredient (s)         | Sample ID |     |        |         |         |
|------------------------|-----------|-----|--------|---------|---------|
|                        | Control   | WMB | WMB-5F | WMB-15F | WMB-25F |
| Wheat flour (g)        | 300       | 270 | 270    | 270     | 270     |
| Mung bean flour (g)    | -         | 30  | 30     | 30      | 30      |
| Yeast (g)              | 6         | 6   | 6      | 6       | 6       |
| Sugar (g)              | 30        | 30  | 30     | 30      | 30      |
| Salt (g)               | 3         | 3   | 3      | 3       | 3       |
| Margarine (g)          | 24        | 24  | 24     | 24      | 24      |
| *Pitaya fermentate (g) | -         | -   | 15     | 45      | 75      |
| Water (mL)             | 180       | 186 | 159    | 136     | 113     |

\*MC: 86%, Total dietary fiber: 0.2 mg/g (Insoluble dietary fiber: 0.14 mg/g, Soluble dietary fiber: 0.06 mg/g).

**Table S2.** Formulation and nutrition of the different customized bread diets.

| Ingredient (g)      | Customized bread diets** |       |        |         |
|---------------------|--------------------------|-------|--------|---------|
|                     | Control                  | WMB   | WMB-5F | WMB-15F |
| Bread powder*       | 500                      | 500   | 500    | 500     |
| Casein, 30 Mesh     | 100                      | 100   | 100    | 100     |
| L-Cystine           | 1.5                      | 1.5   | 1.5    | 1.5     |
| Corn Starch         | 198.5                    | 198.5 | 198.5  | 198.5   |
| Maltodextrin        | 66                       | 66    | 66     | 66      |
| Sucrose             | 50                       | 50    | 50     | 50      |
| Cellulose           | 25                       | 25    | 25     | 25      |
| Soybean Oil         | 35                       | 35    | 35     | 35      |
| t-Butylhydroquinone | 0.007                    | 0.007 | 0.007  | 0.007   |
| Mineral Mix S10022G | 17.5                     | 17.5  | 17.5   | 17.5    |
| Vitamin Mix V10037  | 5                        | 5     | 5      | 5       |
| Choline Bitartrate  | 1.25                     | 1.25  | 1.25   | 1.25    |
| <b>Total</b>        | 1000                     | 1000  | 1000   | 1000    |

\*Bread (Table S1) dried (40 °C for 8 h) and pulverized into a powder. \*\* Processed into pellets, purified (irradiated) by Jiangsu synergy pharmaceutical Bioengineering Co., Ltd (Nanjing, China) (Order number: xd202112001640).

**Figure S1.** Pearson correlation of enzyme activities and properties of dough and bread.

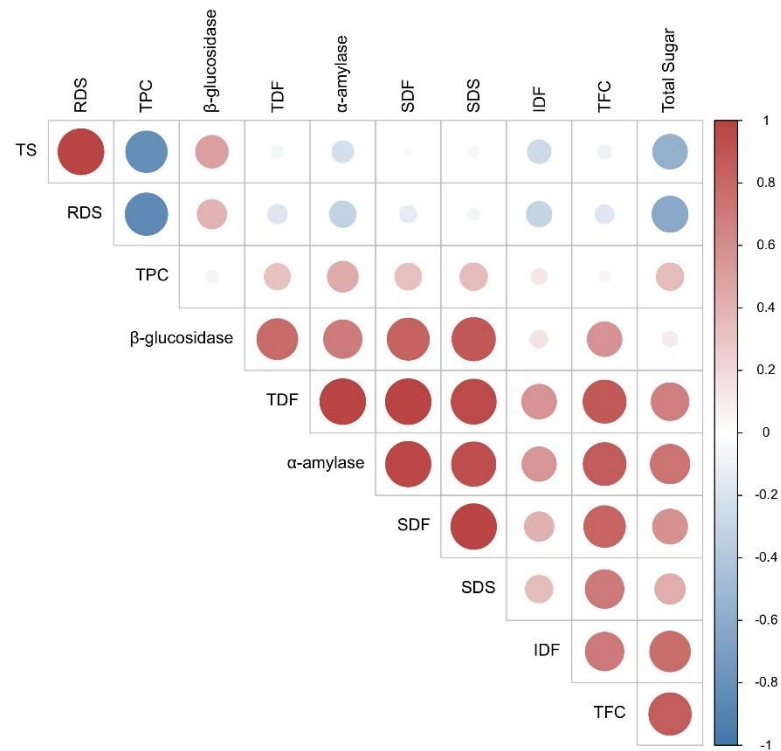

IDF: Insoluble dietary fiber. SDF: Soluble dietary fiber. TDF: Total dietary fiber. TPC: Total phenolic compound. TFC: Total flavonoid content. TS: Total starch. RDS: Rapidly digestible starch. SDS: Slowly digestible starch.

**Figure S2.** The non-metric multi-dimensional scaling plot (NMDS) of the Bray-Curtis similarity coefficients calculated from the 16S rRNA (a). PcoA results on  $\beta$ -diversity of each group (b). Changes in  $\alpha$ -diversity revealed by the Shannon index (c), evenness revealed by Shannoneven index (d), and richness revealed by sobs (e) of gut microbiota from different mice groups fed on customized bread diets.

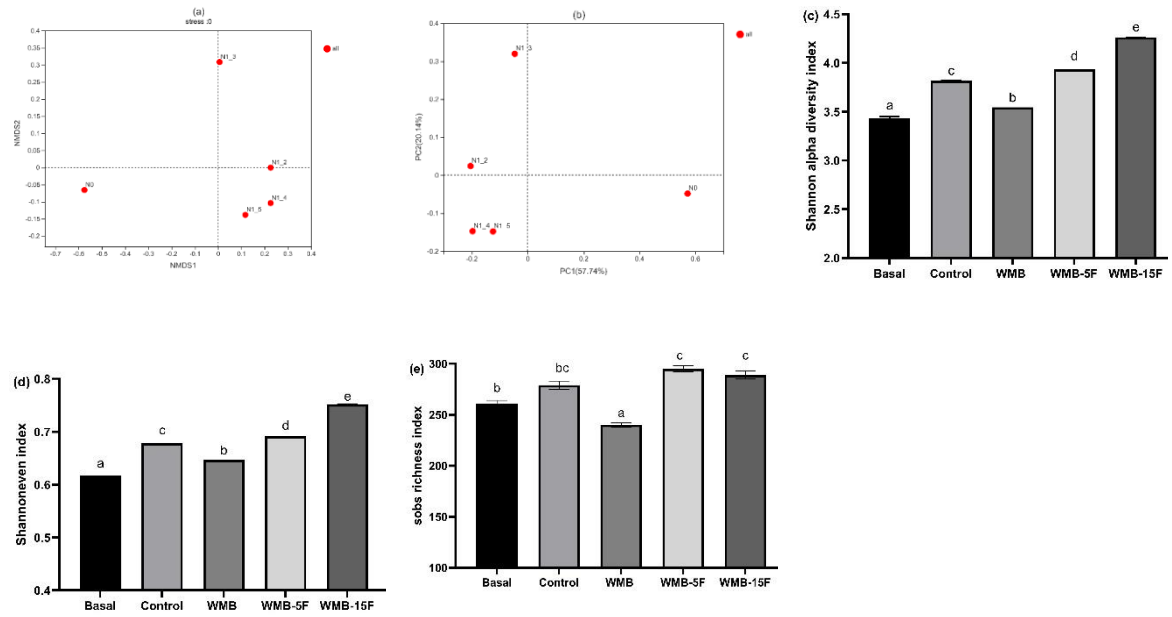

Mice groups at 0 (basal, N0) and after 21 days fed on control (N1\_2), WMB (N1\_3), WMB-5F (N1\_4), and WMB-15F (N1\_5).
